# Supplementary material
Source: PubMed Central journal article supplement (PMC1270005)

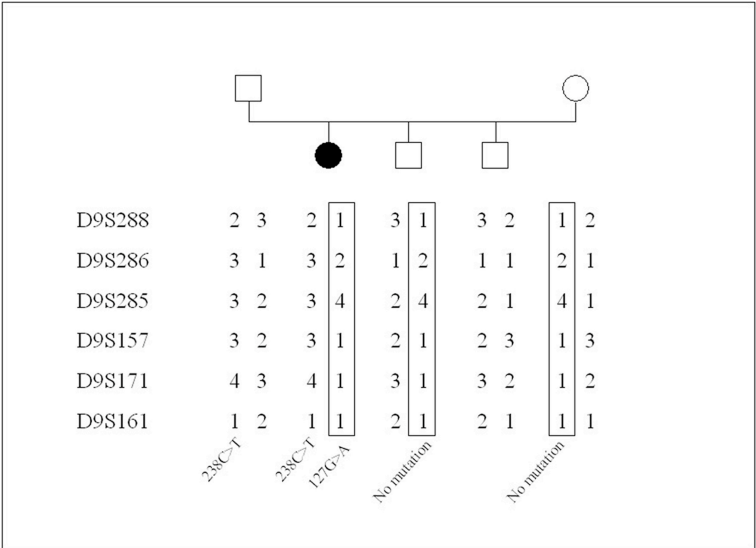

Supplement: pgen.0010047.sg001.pdf [file pgen.0010047.sg001.pdf]
